# Supplementary material
Source: PubMed Central journal article supplement (PMC7721252)
Supplement: supp_8.4.E754_2020-0081-1-at_.pdf [file supp_8.4.E754_2020-0081-1-at_.pdf]

**Appendix 1 (as supplied by the authors)**

**Supplemental Table S1.** Multinomial logistic regression of driving under the influence of cannabis (DUIC) by sex, perceived risk of regular cannabis use, and their interaction term among Canadian grade 11 and 12 students who participated in the 2016-2017 Canadian Student Tobacco, Alcohol and Drugs Survey ( $n = 14\,147$ )

|                                                    | Adjusted RRR <sup>a</sup> (95% CI) |                                     |
|----------------------------------------------------|------------------------------------|-------------------------------------|
|                                                    | Last 30-day DUIC vs. Never         | More than 30-day ago DUIC vs. Never |
| <b>Male</b>                                        |                                    |                                     |
| No (referent)                                      | 1.00                               | 1.00                                |
| Yes                                                | 1.71 (1.08, 2.70)*                 | 1.74 (1.00, 3.02)                   |
| <b>Perceived risk of regular cannabis use</b>      |                                    |                                     |
| No risk (referent)                                 | 1.00                               | 1.00                                |
| Slight risk                                        | 0.58 (0.36, 0.93)*                 | 0.72 (0.41, 1.25)                   |
| Moderate risk                                      | 0.19 (0.11, 0.32)**                | 0.42 (0.24, 0.74)**                 |
| Great risk                                         | 0.05 (0.03, 0.11)**                | 0.13 (0.07, 0.24)**                 |
| Don't know/Not stated                              | N/A                                | N/A                                 |
| <b>Male*Perceived risk of regular cannabis use</b> |                                    |                                     |
| Male*No risk (referent)                            | 1.00                               | 1.00                                |
| Male*Slight risk                                   | 0.96 (0.46, 2.01)                  | 0.91 (0.37, 2.23)                   |
| Male*Moderate risk                                 | 1.01 (0.50, 2.04)                  | 0.70 (0.33, 1.49)                   |
| Male*Great risk                                    | 1.32 (0.55, 3.15)                  | 0.73 (0.30, 1.76)                   |
| Male*Not stated risk                               | N/A                                | N/A                                 |

*Notes:* DUIC = driving under the influence of cannabis; RRR = relative risk ratio; CI = confidence interval; N/A = not applicable.

<sup>a</sup> Adjusted for school grade, rural setting, province, and square of autonomy score.

\*  $p < 0.05$ .

\*\*  $p < 0.01$ .

\*\*\*  $p \leq 0.001$ .

**Supplemental Table S2.** Multinomial logistic regression of driving under the influence of cannabis (DUIC) by rural setting, perceived risk of regular cannabis use, and their interaction term among Canadian grade 11 and 12 students who participated in the 2016-2017 Canadian Student Tobacco, Alcohol and Drugs Survey ( $n = 14\ 147$ )

|                                                     | Adjusted RRR <sup>a</sup> (95% CI) |                                     |
|-----------------------------------------------------|------------------------------------|-------------------------------------|
|                                                     | Last 30-day DUIC vs. Never         | More than 30-day ago DUIC vs. Never |
| <b>Rural setting</b>                                |                                    |                                     |
| No (referent)                                       | 1.00                               | 1.00                                |
| Yes                                                 | 1.59 (1.03, 2.44)*                 | 1.64 (1.13, 2.37)**                 |
| <b>Perceived risk of regular cannabis use</b>       |                                    |                                     |
| No risk (referent)                                  | 1.00                               | 1.00                                |
| Slight risk                                         | 0.51 (0.32, 0.79)**                | 0.73 (0.52, 1.01)                   |
| Moderate risk                                       | 0.20 (0.15, 0.28)***               | 0.40 (0.30, 0.54)***                |
| Great risk                                          | 0.06 (0.03, 0.10)***               | 0.12 (0.08, 0.18)***                |
| Don't know/Not stated                               | N/A                                | N/A                                 |
| <b>Rural*Perceived risk of regular cannabis use</b> |                                    |                                     |
| Rural*No risk (referent)                            | 1.00                               | 1.00                                |
| Rural*Slight risk                                   | 1.40 (0.73, 2.66)                  | 0.78 (0.41, 1.48)                   |
| Rural*Moderate risk                                 | 0.79 (0.34, 1.80)                  | 0.51 (0.29, 0.92)*                  |
| Rural*Great risk                                    | 1.56 (0.64, 3.79)                  | 0.82 (0.42, 1.57)                   |
| Rural*Not stated risk                               | N/A                                | N/A                                 |

Notes: DUIC = driving under the influence of cannabis; RRR = relative risk ratio; CI = confidence interval; N/A = not applicable.

<sup>a</sup> Adjusted for sex, school grade, province, and square of autonomy score.

\*  $p < 0.05$ .

\*\*  $p < 0.01$ .

\*\*\*  $p \leq 0.001$ .

**Supplemental Table S3.** Multinomial logistic regression of riding with a cannabis-impaired driver (RWCD) by sex, perceived risk of regular cannabis use, and their interaction term among Canadian grade 11 and 12 students who participated in the 2016-2017 Canadian Student Tobacco, Alcohol and Drugs Survey ( $n = 14\ 170$ )

|                                                    | Adjusted RRR <sup>a</sup> (95% CI) |                                     |
|----------------------------------------------------|------------------------------------|-------------------------------------|
|                                                    | Last 30-day RWCD vs. Never         | More than 30-day ago RWCD vs. Never |
| <b>Male</b>                                        |                                    |                                     |
| No (referent)                                      | 1.00                               | 1.00                                |
| Yes                                                | 0.88 (0.64, 1.23)                  | 0.79 (0.54, 1.14)                   |
| <b>Perceived risk of regular cannabis use</b>      |                                    |                                     |
| No risk (referent)                                 | 1.00                               | 1.00                                |
| Slight risk                                        | 0.65 (0.44, 0.97)*                 | 0.89 (0.62, 1.27)                   |
| Moderate risk                                      | 0.29 (0.21, 0.39)***               | 0.57 (0.38, 0.84)**                 |
| Great risk                                         | 0.08 (0.06, 0.10)***               | 0.23 (0.16, 0.33)***                |
| Don't know/Not stated                              | N/A                                | N/A                                 |
| <b>Male*Perceived risk of regular cannabis use</b> |                                    |                                     |
| Male*No risk (referent)                            | 1.00                               | 1.00                                |
| Male*Slight risk                                   | 0.79 (0.44, 1.43)                  | 0.97 (0.49, 1.91)                   |
| Male*Moderate risk                                 | 0.97 (0.62, 1.54)                  | 0.83 (0.52, 1.33)                   |
| Male*Great risk                                    | 1.37 (0.80, 2.37)                  | 1.08 (0.67, 1.76)                   |
| Male*Not stated risk                               | N/A                                | N/A                                 |

Notes: RWCD = riding with a cannabis-impaired driver; RRR = relative risk ratio; CI = confidence interval; N/A = not applicable.

<sup>a</sup> Adjusted for school grade, rural setting, province, and square of autonomy score.

\*  $p < 0.05$ .

\*\*  $p < 0.01$ .

\*\*\*  $p \leq 0.001$ .

**Supplemental Table S4.** Multinomial logistic regression of riding with a cannabis-impaired driver (RWCD) by rural setting, perceived risk of regular cannabis use, and their interaction term among Canadian grade 11 and 12 students who participated in the 2016-2017 Canadian Student Tobacco, Alcohol and Drugs Survey ( $n = 14\ 170$ )

|                                                     | Adjusted RRR <sup>a</sup> (95% CI) |                                     |
|-----------------------------------------------------|------------------------------------|-------------------------------------|
|                                                     | Last 30-day RWCD vs. Never         | More than 30-day ago RWCD vs. Never |
| <b>Rural setting</b>                                |                                    |                                     |
| No (referent)                                       | 1.00                               | 1.00                                |
| Yes                                                 | 1.50 (0.98, 2.29)                  | 1.47 (0.96, 2.25)                   |
| <b>Perceived risk of regular cannabis use</b>       |                                    |                                     |
| No risk (referent)                                  | 1.00                               | 1.00                                |
| Slight risk                                         | 0.55 (0.44, 0.68) <sup>***</sup>   | 0.94 (0.72, 1.22)                   |
| Moderate risk                                       | 0.29 (0.233, 0.37) <sup>***</sup>  | 0.55 (0.43, 0.71) <sup>***</sup>    |
| Great risk                                          | 0.10 (0.07, 0.13) <sup>***</sup>   | 0.25 (0.20, 0.33) <sup>***</sup>    |
| Don't know/Not stated                               | N/A                                | N/A                                 |
| <b>Rural*Perceived risk of regular cannabis use</b> |                                    |                                     |
| Rural*No risk (referent)                            | 1.00                               | 1.00                                |
| Rural*Slight risk                                   | 1.12 (0.64, 1.98)                  | 0.74 (0.43, 1.28)                   |
| Rural*Moderate risk                                 | 0.85 (0.48, 1.52)                  | 0.80 (0.48, 1.33)                   |
| Rural*Great risk                                    | 0.64 (0.30, 1.33)                  | 0.74 (0.46, 1.20)                   |
| Rural*Not stated risk                               | N/A                                | N/A                                 |

Notes: RWCD = riding with a cannabis-impaired driver; RRR = relative risk ratio; CI = confidence interval; N/A = not applicable.

<sup>a</sup> Adjusted for sex, school grade, province, and square of autonomy score.

\*  $p < 0.05$ .

\*\*  $p < 0.01$ .

\*\*\*  $p \leq 0.001$ .
